# Supplementary material for: A genome-wide association study links small-vessel ischemic stroke to autophagy
Source: PubMed Central journal article supplement (PMC5680343; doi:10.1038/s41598-017-14355-3), 2017-11-09
Supplement: 41598_2017_14355_MOESM1_ESM.pdf [file 41598_2017_14355_MOESM1_ESM.pdf]

# A genome-wide association study links small-vessel ischemic stroke to autophagy

\*Tsong-Hai Lee<sup>1</sup>, MD, PhD; \*Tai-Ming Ko<sup>2,3</sup>, PhD; Chien-Hsiun Chen<sup>2,4</sup>, PhD; Yeu-Jhy Chang<sup>1</sup>, MD; Liang-Suei Lu<sup>2</sup>, MS; Chien-Hung Chang<sup>1</sup>, MD; Kuo-Lun Huang<sup>1</sup>, MD; Ting-Yu Chang<sup>1</sup>, MD; Jiann-Der Lee<sup>5</sup>, MD; Ku-Chou Chang<sup>6</sup>, MD; Jen-Tsung Yang<sup>5</sup>, MD, PhD; Ming-Shien Wen<sup>1</sup>, MD; Chao-Yung Wang<sup>1</sup>, MD; Ying-Ting Chen<sup>2</sup>, MS; Tsai-Chuan Chen<sup>2</sup>, MS; Shu-Yu Chou<sup>1</sup>, MS; Ming-Ta Michael Lee<sup>7</sup>, PhD; Yuan-Tsong Chen<sup>2,8</sup>, MD, PhD; Jer-Yuarn Wu<sup>2,4</sup>, PhD

<sup>1</sup> Chang Gung Memorial Hospital, Linkou Medical Center, and Chang Gung University College of Medicine, Taoyuan, Taiwan.

<sup>2</sup> Institute of Biomedical Sciences, Academia Sinica, Taipei, Taiwan.

<sup>3</sup> Graduate Institute of Integrated Medicine, College of Chinese Medicine, China Medical University, Taichung, Taiwan.

<sup>4</sup> School of Chinese Medicine, China Medical University, Taichung, Taiwan.

<sup>5</sup> Chang Gung Memorial Hospital, Chiayi Branch, and Chang Gung University College of Medicine, Chiayi, Taiwan.

<sup>6</sup> Chang Gung Memorial Hospital, Kaohsiung Medical Center, and Chang Gung University College of Medicine, Kaohsiung, Taiwan.

<sup>7</sup> Genomic Medicine Institute, Geisinger Health System, Danville, Pennsylvania, USA.

<sup>8</sup> Department of Pediatrics, Duke University Medical Center, Durham, North Carolina, USA.

These authors contributed equally to this work: Tsong-Hai Lee, Tai-Ming Ko

Correspondence should be addressed to:

Yuan-Tsong Chen, MD., PhD. Institute of Biomedical Sciences, Academia Sinica, 128, Academia Road, Section 2. Nankang, Taipei 11529, Taiwan; e-mail: chen0010@ibms.sinica.edu.tw ; Phone: +886-2-27899081; Fax: +886-2-27899085

Jer-Yuarn Wu, PhD. Institute of Biomedical Sciences, Academia Sinica, 128, Academia Road, Section 2. Nankang, Taipei 11529, Taiwan; e-mail: jywu@ibms.sinica.edu.tw ; Phone: +886-2-27899075

**Supplementary Table 1. Summary of discovery studies of top 33 SNPs in trend tests.**

| Chr. | Position  | SNP         | Gene                        | Allele 1 | Allele 2 | Risk allele | RAF controls | RAF cases | Discovery | Trend P | Risk allele OR | 95%CI       |
|------|-----------|-------------|-----------------------------|----------|----------|-------------|--------------|-----------|-----------|---------|----------------|-------------|
| 2    | 742685    | rs60477084  | <i>TMEM18, LINC01115</i>    | A        | G        | A           | 0.3326       | 0.4065    | 1.70E-04  |         | 1.374          | 1.16 1.628  |
| 2    | 57922033  | rs6732639   | <i>VRK2, CCDC85A</i>        | C        | T        | C           | 0.2182       | 0.2794    | 4.35E-04  |         | 1.39           | 1.154 1.674 |
| 2    | 120187344 | rs11123523  | <i>TMEM37, DBI</i>          | A        | G        | A           | 0.4236       | 0.4868    | 2.18E-03  |         | 1.291          | 1.095 1.522 |
| 2    | 120191460 | rs2579631   | <i>TMEM37</i>               | C        | T        | C           | 0.4222       | 0.4839    | 2.91E-03  |         | 1.283          | 1.089 1.513 |
| 2    | 129505509 | rs3907871   | <i>HS6ST1, LOC101927881</i> | T        | C        | C           | 0.6952       | 0.7559    | 1.33E-03  |         | 1.358          | 1.123 1.642 |
| 2    | 146779043 | rs12479100  | <i>PABPC1P2, TEX41</i>      | C        | T        | C           | 0.104        | 0.153     | 2.27E-04  |         | 1.557          | 1.227 1.977 |
| 3    | 11325276  | rs2594966   | <i>ATG7</i>                 | G        | A        | A           | 0.6155       | 0.6959    | 7.00E-05  |         | 1.43           | 1.198 1.706 |
| 3    | 11395821  | rs2594973   | <i>ATG7</i>                 | C        | G        | G           | 0.5948       | 0.6795    | 3.24E-05  |         | 1.445          | 1.212 1.722 |
| 3    | 11443223  | rs4684776   | <i>ATG7</i>                 | C        | T        | T           | 0.6096       | 0.6877    | 1.08E-04  |         | 1.41           | 1.183 1.681 |
| 3    | 11450873  | rs34843621  | <i>ATG7</i>                 | G        | A        | A           | 0.6914       | 0.7625    | 1.79E-04  |         | 1.433          | 1.184 1.734 |
| 3    | 11474823  | rs12637318  | <i>ATG7</i>                 | T        | C        | C           | 0.693        | 0.7625    | 2.50E-04  |         | 1.422          | 1.176 1.721 |
| 3    | 140492139 | rs3923751   | <i>SLC25A36, TRIM42</i>     | G        | A        | A           | 0.9094       | 0.9515    | 2.65E-04  |         | 1.952          | 1.351 2.823 |
| 3    | 140527761 | rs74282906  | <i>SLC25A36, TRIM42</i>     | G        | T        | T           | 0.9097       | 0.9518    | 2.62E-04  |         | 1.958          | 1.354 2.83  |
| 3    | 186451236 | rs4686799   | <i>KNG1</i>                 | T        | C        | C           | 0.6598       | 0.7108    | 9.95E-03  |         | 1.268          | 1.057 1.521 |
| 4    | 126077143 | rs78868369  | <i>ANKRD50, FAT4</i>        | T        | C        | T           | 0.08449      | 0.1268    | 4.81E-04  |         | 1.574          | 1.219 2.033 |
| 4    | 175913798 | rs10026079  | <i>ADAM29, GPM6A</i>        | T        | C        | C           | 0.9286       | 0.9575    | 6.28E-03  |         | 1.731          | 1.168 2.566 |
| 4    | 175919987 | rs10005382  | <i>ADAM29, GPM6A</i>        | G        | C        | C           | 0.9283       | 0.9576    | 5.51E-03  |         | 1.745          | 1.177 2.587 |
| 5    | 81778496  | rs224844    | <i>MIR3977, ATP6AP1L</i>    | T        | C        | T           | 0.455        | 0.5297    | 4.63E-04  |         | 1.349          | 1.143 1.592 |
| 5    | 139539514 | rs2291878   |                             | G        | A        | G           | 0.1969       | 0.2574    | 2.91E-04  |         | 1.413          | 1.167 1.711 |
| 6    | 168098215 | rs536348    | <i>LOC441178, C6orf123</i>  | T        | C        | C           | 0.6407       | 0.7132    | 2.52E-04  |         | 1.395          | 1.165 1.67  |
| 8    | 6067096   | rs73188691  | <i>CSMD1, LOC100287015</i>  | C        | A        | C           | 0.07093      | 0.1033    | 2.72E-03  |         | 1.51           | 1.138 2.003 |
| 8    | 104096256 | rs17201317  | <i>ATP6V1C1, BAALCOS</i>    | C        | T        | C           | 0.1096       | 0.1485    | 3.45E-03  |         | 1.417          | 1.118 1.796 |
| 10   | 70380498  | rs12764361  | <i>TET1</i>                 | A        | C        | A           | 0.1288       | 0.1672    | 7.05E-03  |         | 1.358          | 1.085 1.7   |
| 10   | 72944439  | rs117743525 | <i>PCBD1, UNC5B</i>         | T        | G        | G           | 0.9324       | 0.9603    | 6.60E-03  |         | 1.753          | 1.167 2.634 |
| 11   | 100057536 | rs11223142  | <i>CNTN5</i>                | G        | A        | G           | 0.4477       | 0.5294    | 9.72E-05  |         | 1.388          | 1.177 1.637 |
| 12   | 12810328  | rs2900298   | <i>CREBL2, GPR19</i>        | C        | G        | G           | 0.4991       | 0.5718    | 6.37E-04  |         | 1.34           | 1.136 1.582 |
| 12   | 15176510  | rs2263590   | <i>LOC101928340, RERG</i>   | A        | G        | A           | 0.2693       | 0.3413    | 1.93E-04  |         | 1.406          | 1.178 1.678 |
| 12   | 58097750  | rs75013973  | <i>OS9</i>                  | G        | A        | G           | 0.141        | 0.1969    | 2.60E-04  |         | 1.494          | 1.204 1.853 |
| 13   | 59812089  | rs9570072   | <i>LOC101926897, DIAPH3</i> | C        | T        | T           | 0.8327       | 0.8864    | 4.56E-04  |         | 1.569          | 1.217 2.021 |
| 14   | 22587753  | rs2141974   | <i>OR4E2, DAD1</i>          | C        | T        | C           | 0.07259      | 0.1147    | 2.65E-04  |         | 1.655          | 1.26 2.174  |
| 14   | 80872021  | rs11846182  | <i>DIO2-AS1</i>             | C        | T        | T           | 0.602        | 0.6754    | 2.58E-04  |         | 1.376          | 1.156 1.638 |
| 15   | 82234966  | rs7163891   | <i>LOC101929655, MEX3B</i>  | C        | T        | C           | 0.07423      | 0.1147    | 4.28E-04  |         | 1.616          | 1.236 2.112 |
| 19   | 575964    | rs2238542   | <i>BSG</i>                  | T        | C        | T           | 0.2188       | 0.2657    | 8.07E-03  |         | 1.291          | 1.069 1.561 |

**Supplementary Table 2. Summary of replication studies of top 33 SNPs in trend tests.**

| Chr. | Position  | SNP         | Gene                        | Allele 1 | Allele 2 | Risk allele | RAF controls | RAF cases | Discovery | Trend <i>P</i> | Risk allele OR | 95%CI  |       |
|------|-----------|-------------|-----------------------------|----------|----------|-------------|--------------|-----------|-----------|----------------|----------------|--------|-------|
| 2    | 742685    | rs60477084  | <i>TMEM18, LINC01115</i>    | A        | G        | A           | 0.347        | 0.4016    | 4.08E-02  |                | 1.263          | 1.011  | 1.577 |
| 2    | 57922033  | rs6732639   | <i>VRK2, CCDC85A</i>        | C        | T        | C           | 0.2146       | 0.266     | 2.51E-02  |                | 1.326          | 1.035  | 1.699 |
| 2    | 120187344 | rs11123523  | <i>TMEM37, DBI</i>          | A        | G        | A           | 0.4243       | 0.4973    | 7.79E-03  |                | 1.342          | 1.08   | 1.668 |
| 2    | 120191460 | rs2579631   | <i>TMEM37</i>               | C        | T        | C           | 0.4202       | 0.4973    | 5.03E-03  |                | 1.365          | 1.098  | 1.697 |
| 2    | 129505509 | rs3907871   | <i>HS6ST1, LOC101927881</i> | T        | C        | C           | 0.6979       | 0.7633    | 9.60E-03  |                | 1.396          | 1.084  | 1.797 |
| 2    | 146779043 | rs12479100  | <i>PABPC1P2, TEX41</i>      | C        | T        | C           | 0.0949       | 0.129     | 4.06E-02  |                | 1.413          | 1.015  | 1.968 |
| 3    | 11325276  | rs2594966   | <i>ATG7</i>                 | G        | A        | A           | 0.6105       | 0.6765    | 1.31E-02  |                | 1.334          | 1.059  | 1.681 |
| 3    | 11395821  | rs2594973   | <i>ATG7</i>                 | C        | G        | G           | 0.5918       | 0.6489    | 3.38E-02  |                | 1.275          | 1.017  | 1.598 |
| 3    | 11443223  | rs4684776   | <i>ATG7</i>                 | C        | T        | T           | 0.6067       | 0.6729    | 1.19E-02  |                | 1.334          | 1.06   | 1.678 |
| 3    | 11450873  | rs34843621  | <i>ATG7</i>                 | G        | A        | A           | 0.6839       | 0.738     | 3.35E-02  |                | 1.302          | 1.019  | 1.664 |
| 3    | 11474823  | rs12637318  | <i>ATG7</i>                 | T        | C        | C           | 0.6865       | 0.742     | 2.87E-02  |                | 1.314          | 1.027  | 1.68  |
| 3    | 140492139 | rs3923751   | <i>SLC25A36, TRIM42</i>     | G        | A        | A           | 0.9233       | 0.9521    | 4.75E-02  |                | 1.652          | 1.006  | 2.711 |
| 3    | 140527761 | rs74282906  | <i>SLC25A36, TRIM42</i>     | G        | T        | T           | 0.9233       | 0.9521    | 4.72E-02  |                | 1.653          | 1.007  | 2.714 |
| 3    | 186451236 | rs4686799   | <i>KNG1</i>                 | T        | C        | C           | 0.6454       | 0.7486    | 1.06E-04  |                | 1.637          | 1.276  | 2.099 |
| 4    | 126077143 | rs78868369  | <i>ANKRD50, FAT4</i>        | T        | C        | T           | 0.08796      | 0.133     | 4.55E-03  |                | 1.59           | 1.146  | 2.208 |
| 4    | 175913798 | rs10026079  | <i>ADAM29, GPM6A</i>        | T        | C        | C           | 0.9229       | 0.9681    | 1.71E-03  |                | 2.535          | 1.401  | 4.589 |
| 4    | 175919987 | rs10005382  | <i>ADAM29, GPM6A</i>        | G        | C        | C           | 0.9225       | 0.9654    | 3.01E-03  |                | 2.345          | 1.323  | 4.155 |
| 5    | 81778496  | rs224844    | <i>MIR3977, ATP6AP1L</i>    | T        | C        | T           | 0.4419       | 0.5133    | 1.05E-02  |                | 1.332          | 1.072  | 1.655 |
| 5    | 139539514 | rs2291878   |                             | G        | A        | G           | 0.1883       | 0.242     | 1.45E-02  |                | 1.376          | 1.065  | 1.778 |
| 6    | 168098215 | rs536348    | <i>LOC441178, C6orf123</i>  | T        | C        | C           | 0.6395       | 0.7234    | 1.26E-03  |                | 1.474          | 1.16   | 1.874 |
| 8    | 6067096   | rs73188691  | <i>CSMD1, LOC100287015</i>  | C        | A        | C           | 0.06926      | 0.1117    | 3.05E-03  |                | 1.69           | 1.184  | 2.413 |
| 8    | 104096256 | rs17201317  | <i>ATP6V1C1, BAALCOS</i>    | C        | T        | C           | 0.1093       | 0.1738    | 2.99E-04  |                | 1.715          | 1.276  | 2.304 |
| 10   | 70380498  | rs12764361  | <i>TET1</i>                 | A        | C        | A           | 0.1296       | 0.1962    | 5.56E-04  |                | 1.639          | 1.238  | 2.171 |
| 10   | 72944439  | rs117743525 | <i>PCBD1, UNC5B</i>         | T        | G        | G           | 0.9324       | 0.9814    | 1.75E-04  |                | 3.824          | 1.782  | 8.208 |
| 11   | 100057536 | rs11223142  | <i>CNTN5</i>                | G        | A        | G           | 0.453        | 0.5134    | 2.80E-02  |                | 1.274          | 1.025  | 1.583 |
| 12   | 12810328  | rs2900298   | <i>CREBL2, GPR19</i>        | C        | G        | G           | 0.5028       | 0.5695    | 1.71E-02  |                | 1.308          | 1.051  | 1.629 |
| 12   | 15176510  | rs2263590   | <i>LOC101928340, RERG</i>   | A        | G        | A           | 0.2882       | 0.3431    | 2.91E-02  |                | 1.29           | 1.025  | 1.623 |
| 12   | 58097750  | rs75013973  | <i>OS9</i>                  | G        | A        | G           | 0.1308       | 0.1685    | 4.68E-02  |                | 1.346          | 0.9998 | 1.812 |
| 13   | 59812089  | rs9570072   | <i>LOC101926897, DIAPH3</i> | C        | T        | T           | 0.827        | 0.8803    | 9.36E-03  |                | 1.539          | 1.108  | 2.136 |
| 14   | 22587753  | rs2141974   | <i>OR4E2, DAD1</i>          | C        | T        | C           | 0.06365      | 0.09358   | 2.73E-02  |                | 1.519          | 1.035  | 2.228 |
| 14   | 80872021  | rs11846182  | <i>DIO2-AS1</i>             | C        | T        | T           | 0.6135       | 0.6818    | 9.98E-03  |                | 1.35           | 1.07   | 1.702 |
| 15   | 82234966  | rs7163891   | <i>LOC101929655, MEX3B</i>  | C        | T        | C           | 0.06759      | 0.09893   | 2.71E-02  |                | 1.515          | 1.043  | 2.2   |
| 19   | 575964    | rs2238542   | <i>BSG</i>                  | T        | C        | T           | 0.2233       | 0.3059    | 4.53E-04  |                | 1.533          | 1.207  | 1.946 |



## Supplementary Figure 1:

### B.

| ATG7 SNP1  | ATG7 SNP2  | D'    | r <sup>2</sup> |
|------------|------------|-------|----------------|
| rs2594966  | rs2594973  | 0.987 | 0.893          |
| rs2594966  | rs4684776  | 0.820 | 0.655          |
| rs2594966  | rs34843621 | 0.818 | 0.48           |
| rs2594966  | rs12637318 | 0.827 | 0.486          |
| rs2594973  | rs4684776  | 0.881 | 0.729          |
| rs2594973  | rs34843621 | 0.924 | 0.564          |
| rs2594973  | rs12637318 | 0.937 | 0.573          |
| rs4684776  | rs34843621 | 0.983 | 0.678          |
| rs4684776  | rs12637318 | 0.993 | 0.683          |
| rs34843621 | rs12637318 | 0.998 | 0.984          |

**Supplementary Figure 1: LD structure and logistic regression analyses within the *ATG7* region.** (A)  $-\log_{10}$  ( $P$  values) of SNPs for the best test from the primary scan as a function of genomic positions for the *ATG7* region. (B) LD patterns,  $D'$  value and  $r^2$  among the disease-associated SNPs within the *ATG7* region (Chr3: 11,313,995-11,599,139 based on ensemble version v.GRCh37).
